# Supplementary material for: Production of novel Rieske dioxygenase metabolites enabled by enzyme engineering
Source: Royal Society of Chemistry journal article supplement (doi:10.1039/d3cy00262d), 2023-01-01
Supplement: d3cy00262d1.pdf [file d3cy00262d1.pdf]

## **Production of Novel Rieske Dioxygenase Metabolites Enabled by Enzyme Engineering**

Elizabeth A. Osifalujo,<sup>a</sup> Bailey N. Rutkowski,<sup>a</sup> Louis R. Satterwhite,<sup>a</sup> Phillip C. Betts,<sup>a</sup> Angel K. Nkosi,<sup>a</sup> and Jordan T. Froese<sup>\*a</sup>

a) Department of Chemistry, Ball State University, 1600 W Ashland Ave, Muncie, IN, 47303.

## **Table of Contents**

|                                                                                                                                                                    |         |
|--------------------------------------------------------------------------------------------------------------------------------------------------------------------|---------|
| Experimental Procedures.....                                                                                                                                       | S3-S6   |
| pCP-01 and pCP-02 vector maps and vector sequences.....                                                                                                            | S6-S10  |
| Toluene dioxygenase single mutant sequence alignment.....                                                                                                          | S11     |
| Toluene dioxygenase double/triple mutant sequence alignment .....                                                                                                  | S12     |
| TDO variant activity data for non-polar substrates.....                                                                                                            | S13     |
| [(5S,6R)-5,6-Dihydroxy-1,3-cyclohexadien-1-yl]methylacetamide (1) and [(5S,6R)-5,6-Dihydroxy-1,3-cyclohexadien-1-yl]ethylacetamide (2) characterization data.....  | S14     |
| [(5S,6R)-5,6-Dihydroxy-1,3-cyclohexadien-1-yl]methylacetamide (1) NMR spectra.....                                                                                 | S15     |
| [(5S,6R)-5,6-Dihydroxy-1,3-cyclohexadien-1-yl]methylacetamide (1) COSY spectrum.....                                                                               | S16     |
| [(5S,6R)-5,6-Dihydroxy-1,3-cyclohexadien-1-yl]ethylacetamide (2) NMR spectra.....                                                                                  | S17     |
| [(5S,6R)-5,6-Dihydroxy-1,3-cyclohexadien-1-yl]ethylacetamide (2) COSY spectrum.....                                                                                | S18     |
| [(5S,6R)-5,6-Dihydroxy-1,3-cyclohexadien-1-yl]methylacetamide (1) and [(5S,6R)-5,6-Dihydroxy-1,3-cyclohexadien-1-yl]ethylacetamide (2) NMR spectra comparison..... | S19     |
| Active site cavity and docking analyses of TDO L272F.....                                                                                                          | S20-S21 |
| Active site cavity and docking analyses of TDO V309N.....                                                                                                          | S22-S23 |

## General Experimental

*E. coli* BL21 (DE3) competent cells were obtained from ThermoFisher. Plasmid isolation/purification was performed using New England Biolabs Monarch® miniprep kit. Transformations of electrocompetent cells were performed on an Eppendorf Eporator®. Whole-cell assay cultures were grown in Greiner Bio-One polystyrene clear, round-bottom 96-well plates. All cultures were incubated in a Barnstead MaxQ 4000 Digital Orbital Incubator Shaker equipped with an EnzyScreen universal clamp system unless otherwise stated. Fluorescence analyses were performed using a Biotek® Synergy™ H1 monochromator-based multi-mode plate reader, using Corning® polystyrene black, opaque, flat-bottom 96-well plates. All reagents were obtained from MilliporeSigma unless otherwise stated. Media were made at pH 7.2 and streptomycin was added at 50 µg mL<sup>-1</sup>. All *E. coli* cultures were maintained at 37 °C unless otherwise stated. NMR analyses were performed using a Jeol ECZ 400S (400 MHz) instrument. IR spectra were collected using a PerkinElmer Frontier FT-IR spectrometer. High-resolution mass spectrometry data were collected by the University of Illinois Urbana-Champaign Mass Spectrometry lab. Homology modelling was performed using Alphafold2.<sup>1</sup> Docking analyses were performed using AutoDock Vina.<sup>2</sup> Molecular dynamics simulations were performed using GROMACS.<sup>3</sup> Mapping of active site cavities was performed using PyMOL.<sup>4</sup>

## Vector Construction<sup>5</sup>

A 2.1-kbp DNA fragment including todC2BA was PCR amplified from pDTG601A<sup>6</sup> using primers TODC2BAF (GTATAAGAAGGAGATATACAATGATTGATTTCAGCCAAC) and TODC2BAR (TATCCAATTGAGATCTGCCATCACGTTAGGTCTCCTTC) and cloned into the NdeI site of pCDF-Duet-1 using NEBuilder® HiFi DNA Assembly (New England Biolabs) to yield plasmid pCP-01. todC1 (1.4-kbp) was then amplified from pDTG601A<sup>6</sup> using primers TODC1F (ACTTTAATAAGGAGATATACATGAATCAGACCGACACATCAC) and TODC1R (TGATGGTGATGGCTGCTGCCTCAGCGTGTGCCTTCAG) and cloned into the NcoI site of pCP-01 using NEBuilder® HiFi DNA Assembly (New England Biolabs) to yield plasmid pCP-02. Full vector sequences and vector maps are provided below (**Figures S1 and S2**).

## Mutant library generation<sup>7</sup>

The pCP-02 expression system was used as the template for toluene dioxygenase mutant library generation.<sup>5</sup> Saturation mutagenesis was performed following the procedure of Liu and Naismith.<sup>7</sup> Amplification was performed using an ABI GeneAmp® 9700 Thermal Cycler. Mutagenic primers were designed according to the procedure of Liu and Naismith<sup>7</sup> (toluene dioxygenase

|      |      |         |                                                         |
|------|------|---------|---------------------------------------------------------|
|      | M220 | forward | primer –                                                |
|      |      |         | TGCAGCGACNNKTACCATGCCGGGACGACCTCGCATCTGTCTGGC;          |
|      |      |         | M220 reverse                                            |
|      |      |         | primer – GGCATGGTAMNNGTCGCTGCAAACTGCTCTGCGGCGAATTTCC;   |
| A223 |      | forward | primer – CATGTACCATNKGCGGACGACCTCGCATCTGTCTGGCATCCTGGC; |
|      |      | reverse | primer –                                                |
|      |      |         | GGTCGTCCCMNNATGGTACATGTCGCTGCAAACTGCTCTGCGG;            |
|      |      | L272    | forward                                                 |
|      |      |         | primer – GACCCCAATNNKATGCTTGCCATCATGGGGCCAAAGGTCACCAGC; |
|      |      | L272    | reverse                                                 |
|      |      |         | primer – GGCAAGCATMNNATTGGGGTGCCTGACATAGAAGCCACTTCCATG; |

I276 forward primer – GATGCTTGCCNNKATGGGGCCAAAGGTCACCAGCTACTGGACCG; I276 reverse primer – TGGCCCCATMNNGGCAAGCATCAGATTGGGGTCGCCGACATAGAAG; V309 forward primer – GAAACTCATGNNKGAGCACATGACCGTCTTCCCCACGTGTTTCCTTC; V309 reverse primer – CATGTGCTCMNNCATGAGTTTCGAGCCGCGCTCCACGCTACCCAG; L321 forward primer – GTGTTTCCTTCNNKCCAGGTATCAATACGGTCCGGACATGGCATCC; L321 reverse primer – GATACCTGGMNNGAAGGAACACGTGGGGGAAGACGGTCATGTGCTC; I324 forward primer – CTCCCAGGTNNKAATACGGTCCGGACATGGCATCCGCGCGGGGCCG; I324 reverse primer – GACCGTATTMNNACCTGGGAGGAAGGAACACGTGGGGGAAGACGG; F366 forward primer – CTGCGCACCNKTCTGCCGGTGGCGTGTTCGAGCAGGACGACGGG; F366 reverse primer – ACCGGCAGAMNNGGTGCGCAGCGTCTGGCGCCGGAACCTTCCTTG). Sequencing analyses were performed by Eurofins Genomics© (Louisville, KY).

### Generation of combined (double and triple) mutants<sup>7</sup>

Plasmids bearing active site mutations generated as part of the study were used as the templates for the introduction of additional mutations. The introduction of point mutations was performed following the procedure of Liu and Naismith.<sup>7</sup> Amplification was performed using an ABI GeneAmp® 9700 Thermal Cycler. Mutagenic primers were designed according to the procedure of Liu and Naismith<sup>7</sup> (L272W/I276V forward primer – GATGCTTGCCGTGATGGGGCCAAAGGTCACCAGCTACTGGACCG; L272W/I276V reverse primer – TGGCCCCATCACGGCAAGCATCCAATTGGGGTCGCCGACATAGAAG; V309G forward primer – GAAACTCATGGGCGAGCACATGACCGTCTTCCCCACGTGTTTCCTTC; V309G reverse primer – CATGTGCTCGCCCATGAGTTTCGAGCCGCGCTCCACGCTACCCAG). Sequencing analyses were performed by Eurofins Genomics© (Louisville, KY).

### Whole-cell fermentation 96 well-plate assay protocol<sup>5,8,9</sup>

*E. coli* (BL21 (DE3)) electrocompetent cells were transformed with isolated pCP-02 plasmids expressing toluene dioxygenase (parent and/or mutant libraries), and with isolated pCP-01 plasmids as negative controls.<sup>5</sup> The transformation cultures were selected on LB + streptomycin plates overnight. Single colonies were inoculated into 160 µL LB + streptomycin media with 0.3% glucose in a 96-well round bottom seed plate and incubated with shaking overnight. All plates included 3 or more wells containing *E. coli* (BL21 (DE3)) pCP-02 cells expressing the parent toluene dioxygenase enzyme, and 3 or more wells containing *E. coli* (BL21 (DE3)) pCP-01 (negative control).<sup>5</sup> Seed plates were used to inoculate 5 µL into 155 µL LB media containing streptomycin in a fresh 96-well round bottom assay plate, and the cultures were incubated with shaking for 2.75 h. The assay plates were then pelleted, and the supernatant discarded. Cultures were resuspended in 150 µL minimal media (KH<sub>2</sub>PO<sub>4</sub> – 7.5 g L<sup>-1</sup>; citric acid – 2 g L<sup>-1</sup>; MgSO<sub>4</sub>·7H<sub>2</sub>O – 5 g L<sup>-1</sup>; trace metal solution – 2 mL L<sup>-1</sup> [Na<sub>2</sub>SO<sub>4</sub> – 1 g L<sup>-1</sup>; MnSO<sub>4</sub> – 2 g L<sup>-1</sup>; ZnCl<sub>2</sub> – 2 g L<sup>-1</sup>; CoCl<sub>2</sub>·6H<sub>2</sub>O – 2 g L<sup>-1</sup>; CuSO<sub>4</sub>·5H<sub>2</sub>O – 0.3 g L<sup>-1</sup>; FeSO<sub>4</sub>·7H<sub>2</sub>O – 10 g L<sup>-1</sup>; pH 1.0]; conc. H<sub>2</sub>SO<sub>4</sub> – 1.2 mL L<sup>-1</sup>; ferric ammonium citrate – 0.3 g L<sup>-1</sup>; glucose – 4 g L<sup>-1</sup>; thiamine – 0.034 g L<sup>-1</sup>; pH 7.2)<sup>8</sup> containing streptomycin and incubated for a 1 h recovery period.

Following this, the cultures were induced to a final concentration of 0.5 mM IPTG and the incubation temperature was reduced to 30 °C. After a 2 h induction period, aromatic substrates were added as 68 mM stock solutions in DMSO to a final concentration of 2 mM. Cultures were incubated with aromatic substrates for 1.5 h at 30 °C, after which the cultures were pelleted. A 100 µL portion of supernatant from each well was transferred to 96-well black opaque assay plates. The reaction was initiated by adding a 50 µL of NaIO<sub>4</sub> stock solution to each well to a final concentration of 10 mM, and the assay plates were incubated with shaking at room temperature for 30 min. Cleaved diols were detected by adding 50 µL of fluoresceinamine stock solution (prepared with 3 µL conc. HCl (11.65 M)/1 mL fluoresceinamine solution) to each well to a final concentration of 0.1 mM.<sup>5</sup> Assay plates were incubated with shaking at room temperature for 5 h. The fluorescence response from each well was analyzed at 485 nm (ex), 520 nm (em), and normalized to the mean fluorescence response of the negative controls ( $[I - I_0]/I_0$ ).

### **Preparative scale production of [(5S,6R)-5,6-Dihydroxy-1,3-cyclohexadien-1-yl]methylacetamide (1) and [(5S,6R)-5,6-Dihydroxy-1,3-cyclohexadien-1-yl]ethylacetamide (2)<sup>5,8,9</sup>**

*E. coli* (BL21 (DE3)) electrocompetent cells were transformed with isolated plasmid expressing the TDO L272W/I276V variant and selected on LB agar containing streptomycin overnight. Single colonies were inoculated into 5 mL LB medium containing streptomycin and 0.3% glucose and incubated with shaking overnight. Cultures (2 × 500 mL LB with streptomycin in 2000 mL Erlenmeyer flasks) were inoculated with 5 mL overnight culture each and incubated with shaking. Growth of the cultures was monitored via optical density measurement at 600 nm. Upon reaching an OD<sub>600</sub> of 0.5–0.6 AU, 500 mL cultures were pelleted and resuspended in minimal media (KH<sub>2</sub>PO<sub>4</sub> – 7.5 g L<sup>-1</sup>; citric acid – 2 g L<sup>-1</sup>; MgSO<sub>4</sub>·7H<sub>2</sub>O – 5 g L<sup>-1</sup>; trace metal solution – 2 mL L<sup>-1</sup> [Na<sub>2</sub>SO<sub>4</sub> – 1 g L<sup>-1</sup>; MnSO<sub>4</sub> – 2 g L<sup>-1</sup>; ZnCl<sub>2</sub> – 2 g L<sup>-1</sup>; CoCl<sub>2</sub>·6H<sub>2</sub>O – 2 g L<sup>-1</sup>; CuSO<sub>4</sub>·5H<sub>2</sub>O – 0.3 g L<sup>-1</sup>; FeSO<sub>4</sub>·7H<sub>2</sub>O – 10 g L<sup>-1</sup>; pH 1.0]; conc. H<sub>2</sub>SO<sub>4</sub> – 1.2 mL L<sup>-1</sup>; ferric ammonium citrate – 0.3 g L<sup>-1</sup>; glucose – 4 g L<sup>-1</sup>; thiamine – 0.034 g L<sup>-1</sup>; pH 7.2) containing streptomycin.<sup>8</sup> After 1 h of recovery in minimal media, the cultures were induced to a final concentration of 0.5 mM IPTG and the incubation temperature decreased to 30 °C. After a 2 h induction period, substrates prepared as solutions in DMSO were added directly via pipette to the cultures, in two portions, to a final concentration of 2 mM. The cultures were incubated with the substrates for 3 h, and subsequently pelleted and the supernatant decanted. The combined supernatant was then extracted with 3 × 1 L EtOAc, and the combined extracts were dried over anhydrous MgSO<sub>4</sub>. The dried extract was concentrated and the compounds purified through column chromatography using deactivated silica as the stationary phase (95 : 5; dichloromethane (DCM) : methanol (MeOH)).

### **Computational Visualization of the TDO/TDO variant active sites<sup>1,4</sup>**

Homology models were generated using AlphaFold2<sup>1</sup> for analysis of TDO variant active sites. The active site cavity in each case was mapped using the surface feature of PyMOL (cavity detection radius – 3 solvent radii; cavity detection cutoff – 1 solvent radius).<sup>4</sup>

## Enzyme-Substrate Docking Analysis and Molecular Dynamics Simulation<sup>1-3,11</sup>

Homology models generated with AlphaFold2<sup>1</sup> were utilized for docking analysis with TDO variants. Enzyme structures were prepared for docking analysis by removing all heteroatoms, repairing all missing atoms, adding polar hydrogens and Kollman charges, and setting grid box parameters to limit binding to the active site ( $x = 30 \text{ \AA}$ ,  $y = 30 \text{ \AA}$ ,  $z = 30 \text{ \AA}$ ) using AutoDock Tools.<sup>9</sup> Ligand structures were similarly prepared using AutoDock Tools.<sup>10</sup> Docking Analysis was performed using AutoDock Vina.<sup>2</sup> The resultant binding predictions were filtered for binding modes that could result in the successful metabolism of the substrate. All reported affinities represent the highest affinity levels among binding modes that could result in the successful metabolism of the substrate. The docking predictions produced were subsequently subjected to molecular dynamics simulations using GROMACS.<sup>3</sup> Topologies were generated for both the ligand and enzyme using the CHARMM36 force field (July 2022).<sup>11</sup>

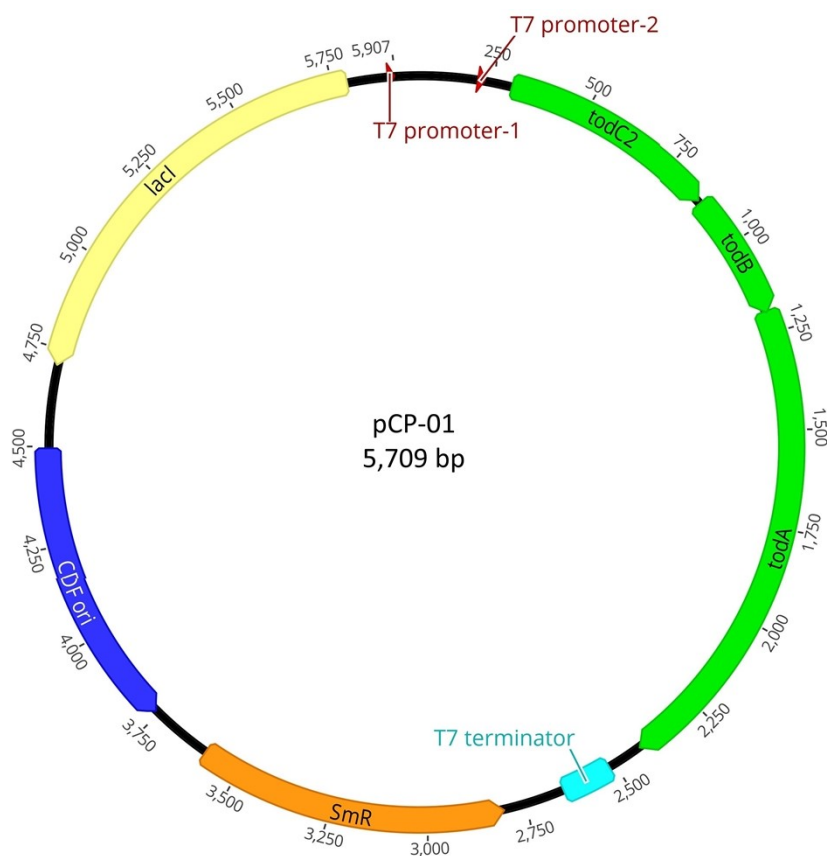

**Figure S1:** Vector map of pCP-01 harboring TDO genes *todC2* (oxygenase–structural), *todB* (ferredoxin), *todA* (reductase). Vector map generated with Geneious version 2023.1 (Biomatters).

pCP-01 vector sequence:

ggggaattgtgagcggataacaattcccctgtagaataatTTTTGTTTAACTTTAATAAGGAGATATACCATGGGCA  
gcagccatcaccatcatcaccacagccaggatccgaattcgagctcggcgcgcctgcaggtcgacaagcttgcggcc  
gcataatgcttaagtgcgaacagaaaagtaatcgattgtacacggccgcataatcgaaattaatacgactcactatag  
gggaattgtgagcggataacaattccccatcttagtatattagTTAAGTATAAGAAGGAGATATACAATGATTGATT  
cagccaacagagccgacgtctttctccgcaagccggcaccctgtagcggccgaactgcagcacgaagtgcagcagttc  
tactattgggaggccaagcttctcaacgatcgccgcttcgaggagtgggttcgcgctgctcgcggaagacattcacta  
cttcatgcccatttcgaccacgcggatcatgcccggactcgcgccttgaatactcaggctcccgcagagtacgcgcact  
tcgatgacgacgccacgatgatgaagggacgcttgcgcaagatcacgtccgacgtgagctgggtccgagaaccccgc  
tcgaggaccggcatctcgtgagcaacgtgatgatcgtcggcgcagaggcagaaggggagtacgaaatctcaagcgc  
cttcattgtgtaccgcaatcgtctggagcggcagctcgacatctttgcccgggtgagcgtcgcgatacgttgcgccc  
acacgagcggggccgggttcgagatcgtcaatcggaccatcctgatcgaccagagcaccatcctggccaataacctc  
agtttcttcttaggtgatgtcatgacttggacatacatattgcccaggggtgacctgccaccgggtgagatgcag  
cgctacgaaggcggcccggaacctgtgatggctcgtcaacgtcgatggcgagttcttcgcccgtgcaggatacctgc  
gcatggggactgggctgtcggatgggttaacctggacgggtgatattgtcgaatgcacgttgcatttcggcaagttct  
gcggtcgggaccgggaaggtgaagggcgtgctgcttgcacaaacctatcaaggtattcccacaaaggtcgaaggcgt  
gaagtgcacgtcgatctcgacaacggggagttgaagtgatggctacccatgtggcgatcatcggcaatggcgtgggt  
ggcttcacgacccgcaggccctacgtgcccgggcttcgaggggagaaatctcgtgatctggggcgaacacgcacatc  
cccctacgaccgaccatccttgcacaaggcgggttcgacggcagccttgagcggccgcccatactggccgagccg  
attggtagcggcaggcccgatcgacatgctgaccggcccggaagtcactgcccttgatgtgcagacaaggacgatc  
agtctggatgatggcaccacgctctctcgcggacgccatcgtcatcgcgacgggcagtcgagcgcggacgatggcgtt  
gcccggcagccaactgcccggcgtcgtaacgctgcgcacctacgggtgacgtgcaggtattgcgcgatagttggactt  
cgcgacgcggctgctgattgtgggtggcggattgatcggctgcgaggtcgcgacgacggcgcgcaagctcggcctg  
tcggtcacgatcctggaggcagggtgatgaactgctgggtccgagtaacttggggcggcgtatcgggtgctggctgcg  
cctgctgacagaacttgggtgtcaggtcgagttgggaaacgggtgctcgtagggttttctgggtgagggccagctcga  
aacatgctggccagcagatggggcgcagcttctgtagccgatagcgcactcatttgcgtcggcgcggagcccgcggat  
caacttgcgcgtcaagcgggcttggcatgtgaccgcggcgtcattgtcgatcactgcccgtgcgacgcttgcacaa  
aggcgtatccgcctcggagatgtggccagttggccgctgcgcgcggcggcggcggcgttcgctcgaacacctat  
atgaacgcgcagcgaacggcggcgggtggtcgcggccattctggggaaaaacgtatcggcaccgcaactgcccgt  
gctcctggacgagatcgcctggtgcatgcagatggcggggcgatatcgaaggacctgggtgatttctcgtctcgc  
gcggcagatgcccggtagtgccgctcgcagagcgaaggattcaggcggctcgtcgcggctcgatgcaccccgtgact  
tcgcgcttgcaccccgatgtgtagaagcccgcgcggcaatcgagccagcagcggctggcagatcttccaaacagta  
tgcgatcttctcgtgcgaatgaaggagacctaacgtgatggcagatctcaattggatcgcggccggccacgcgat  
cgtgacgtcggtaacctcgagctcgtgtaagaaacggcgtgctgcgaaatttgaacgccagcagatggactcgtct  
ac  
tagcgcagcttaattaacctaggctgctgccaccgctgagcaataactagcataaacccttggggcctctaaacggg  
tcttgagggggtttttgctgaaacctcaggcatttgagaagcacaacgggtcacactgcttccggtagctcaataaac  
cggtaaacggcaatagacataagcggctatttcaacgacctgcccgaaccgacgacgggtcactcgtgcccggatc  
cttgcggccctcggcttgaacgaattggttagacattttgcccactaccttgggtgatctcgccttccagctgag  
tggacaaattctccaactgatctgcgcgcgagggccaagcgatcttcttcttgcacaagataagcctgtctagctt  
caagtatgacgggctgatactgggcccggcaggcgtccattgcccagtcggcagcagacatccttcggcgcgattt  
tgcgggttactgcgctgtaccaaattgcccggacaacgtaagcactacatttgcgtcatcgcagcccagtcggg  
cggcaggtccatagcgttaagggtttcatttagcgcctcaaatagatcctgttcaggaaaccggatcaaagagtt  
cctccgcccgtggaacctaccaaggcaacgctatgttctcttgccttttgcagcaagatagccagatcaatgtc  
gatcgtggtcgaatgctcattgctgctgccattctccaaattgcagtttcgcgcttagctggataacgccacgga  
atgatactgctcgtgcacaacaatgggtgacttctacagcgcggagaatctcgtctctccagggggaagccga  
agtttccaaaaggctcgttgatcaaagctcgcgcgcttggttcatcaagccttacggtcaccgtaaccagcaa  
atcaatcactgctggtggttccaggccgcatccactgcccagcggatcaaatgtacggccagcaacgtcgggtc  
gagatggcgctcgatgacgccaactacctgatagttgagtcgatacttccggcgatcaccgcttccctcatac  
tcttcccttttcaatattatgaaagcatttatcagggttattgtctcatgagcggatataatattgaaatgta  
tatttagaaaaataacaaatagctagctcactcggctcgtacgctccgggctgagactgcggcgggctgctg  
cggacacatacaaagttaccacagattccgtggataagcaggggactaacatgtgaggcaaaaacagcaggg  
ccgcgcgggtggcgtttttccataggctccgcctctgccagagttcacataaacagacgcttttccgggtg  
catctgtgggagccgtgaggctcaaccatgaatctgacagtcacgggcaaacccgcagaggacttaagatccc  
caccgcttccggcgggtcgcctcctcttgcgctctcctgttccgacccctgctacagctcacacactg  
gtatctcggctcgggtgtaggtcgttcgctccaagctgggctgtaagcaagaactcccgttcagcccgactgct  
gcg

ccttatccggtaactgttcacttgagtgccaacccggaaaagcacgggtaaaacgccactggcagcagccattggtaac  
 tgggagttcgcagaggatttggtttagctaaacacgcgggttgctcttgaagtgtgcgccaaagtccggctacactgga  
 aggacagatttgggttgctgtgctctgcgaaagccagttaccacgggtaagcagttccccaactgacttaacctcga  
 tcaaaccacctccccaggtgggtttttcgtttacagggcaaaagattacgcgcagaaaaaaggatctcaagaagat  
 cttttgatcttttctactgaaccgctctagatttcagtgcaatttatctcttcaaagttagcacctgaagtcagccc  
 catacgatataagttgtaattctcatgttagtcatgccccgcgcccaccggaaggagctgactgggttgaaggctct  
 caagggcatcggtcgagatcccgggtgcctaagttagtgagctaaacttacattaattgcggttgcgctcactgcccgctt  
 tccagtcgggaaaacctgtcgtgccagctgcattaatgaatcggccaacgcgcggggagaggcgggttgcgattggg  
 cgccaggggtgggtttttctttcaccagtgagacggggcaacagctgattgccttcaccgcctggccctgagagagtt  
 gcagcaagcgggtccacgctgggttggccccagcaggcgaaaatcctggttgatgggtgggtaacggcggggatataacat  
 gagctgtcttcgggtatcgtcgatcccactaccgagatgtccgcaccaacgcgcagcccggactcggtaatggcgcg  
 cattgcgcccagcgcacatctgatcgttggcaaccagcatcgcagtggaacgatgcctcattcagcatttgcatgg  
 tttggtgaaaaccggagatggcactccagtcgccttcccgttccgctatcggctgaatttgattgctgagtgagat  
 ttatgccagccagcagacgcagacgcgcgagacagaacttaattggggcccgctaacagcgcgatttgctggtgacc  
 caatgcgaccagatgctccacgcccagtcgcgtaccgtcttcatgggagaaaaataactggttgatgggtgctggt  
 cagagacatcaagaaataacgcgggaacattagtgacggcagcttccacagcaatggcatcctgggtcatccagcggga  
 tagttaatgatcagcccactgacgcggttgcgcgagaagattgtgcaccgcccgtttacaggcttcgacgcgcttcg  
 ttctaccatcgacaccaccacgctggcaccagttgatcggcgcgagatttaatcgccgcgacaatttgcgacggcg  
 cgtgcagggccagactggaggtggcaacgccaatcagcaacgactgtttgcccgccagttggttgccacgcgggtg  
 ggaatgtaattcagctccgccatcgcgcgcttccacttttcccgcggttttcgcagaaacgtggctggcctgggtcac  
 cacgcgggaaaacggtctgataagagacaccggcatactctgcgacatcgtataacgttactgggttccacattcacca  
 ccctgaattgactctcttccgggcgctatcatgccataccgcgaaagggttttgccgcatcogatggtgtccgggatc  
 tcgacgctctcccttatgcgactcctgcattaggaattaatacgactcactata

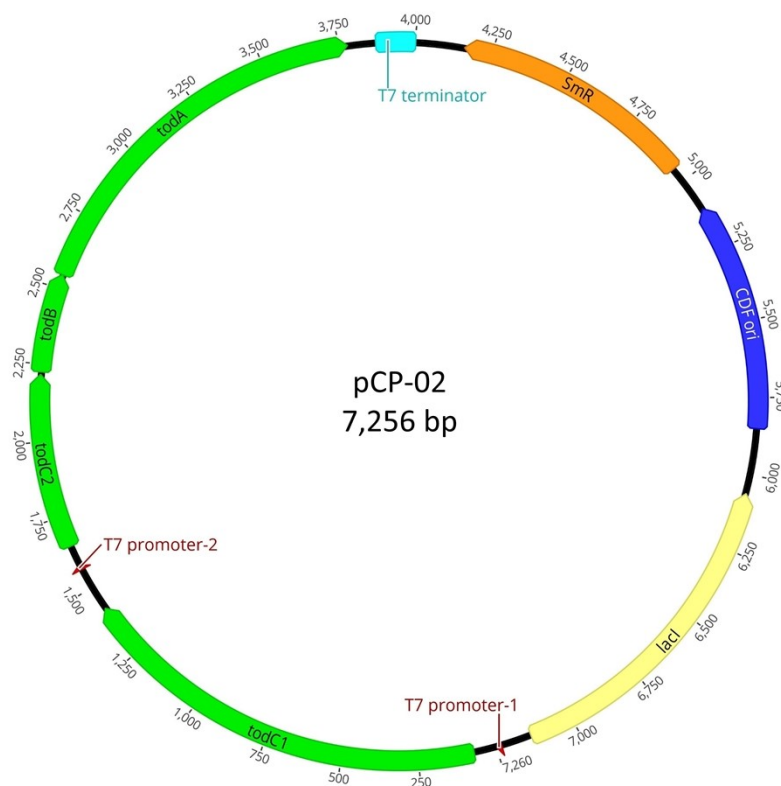

**Figure S2:** Vector map of pCP-02 harboring TDO genes *todC1* (oxygenase – catalytic), *todC2* (oxygenase – structural), *todB* (ferredoxin), *todA* (reductase). Vector map generated with Geneious version 2023.1 (Biomatters).



pCP-02 vector sequence:

ggggaattgtgagcggataacaattcccctgtagaataatTTTTGTTTAACTTTAATAAGGAGATATACATGAATCA  
gaccgacacatcacctatcaggctgcgaggagctggaacaccagcagatagaagcgcctctttgacgagcatgccg  
gacgtatcgatccgcgcattttataccgatgaggatctgtaccaactcgaactggagcgtgtcttcgcccggtcctgg  
ctgctgttggggcatgaaaccagatttcgcaagccgggcgattacatcacgacctacatgggtgaagaccctgtcgt  
ggtcgtccggcagaaagacgccagcattgcccgtgttccctgaaccagtgcgccaccgtggcatgcgcatctgccgcg  
cggatgccggaaacgcgaaggcgttcacttgcagctaccacgggtgggcttacgacaccgccggcaatcttgtcaat  
gtgccttacgaggccgaatccttcgcgtgectgaacaagaaggaatggagcccgtgaaggcccgggtagaaacct  
caagggcctgattttcgccaactgggatgagaacgctgtagacctcgacacgtatctgggcgaggcgaagtctaca  
tggaccacatgctcgaccgcaccgaggccggcaccgaagcgtatcccgggctgcagaagtgggtcattccctgtaac  
tggaaattcgccgagagcagttttgcagcgacatgtaccatgccgggacgacctcgcatctgtctggcatcctggc  
aggcctgccagaagacctgaaatggccgaccttgcctccgcccagcttggcaagcagtaaccgtgctcatggggcg  
gacatggaagtggcttctatgtcggcgacccccaatctgatgcttggccatcatggggccaaaggtcaccagctactgg  
accgaaggccccgcgtcggaaaaggcggccgaacgtctgggtagcgtggagcgggctcgaactcatggtcgagca  
catgaccgtcttccccacgtgttccctccctcccaggtatcaatacgggtccggacatggcatccgcgccccggaacg  
aggctcgaggtatgggcttaccggtggctcgatgctgatgctcctgacgatatacaaggaagagtccggcgccagacg  
ctgcgcaccttctctgccgggtggcgtgttcgagcaggacgacggggagaaactgggtcgagatccagcacatcctgcg  
agggcacaaggcggcggcggccttcaatgccgagatgagcatgagcgggctctatgccattggctgcccgtgatgaca  
ccgggctgatcagcaacaacgtctacagcgggaagctgcccgggctctatgccattggctgcccgtgatgaca  
tccccgactgggacgcgtgaaggcgacacgctgaggcagcagccatcaccatcatcaccacagccaggatccgaa  
ttcgagctcggcgccctgcaggctcgacaagcttgcggccgataatgcttaagtcgaacagaaagtaatcgattg  
tacacggccgcataatcgaaattaatcgactcactataggggaattgtgagcggataacaattccccatcttagta  
tattagtttaagtataagaaggagatatacaatgattgattcagccaacagagccgacgtcttctccgcaagccggc  
accgtagcggcccgaactgcagcagcaagctcgagcagtttactattgggaggccaagcttctcaacgatcgccgct  
tcgaggagtgggttcgcgctgctcgcggaagacattcaacttcatgcccattcgcaccacgcggatcatgcccggac  
tcgcgcttgaatactcaggctcccagagtagcgcgcacttcgatgacgacgccacgatgatgaagggacgcttgcg  
caagatcacgtccgacgtgagctgggtccgagaaccccgcatcgcggaccggcgtctcgtgagcaacgtgatgatcg  
tcggcgagagggcagaaggggagtagcaaatctcaagcgccttcatgtgtaccgcaatcgtctggagcggcagctc  
gacatctttgccggtgagcgtcgcgatacgttgcgcccgaacacgagcagggccgggttcgagatcgtcaatcggac  
catcctgatcgaccagagcaccatcctggccaataacctcagtttcttctcttaggtgatgtcatgacttggacata  
catattgcccaggggtgacctgccaccgggtgagatgcagcgtacgaaggcggccccggaacctgtgatggtctgca  
acgtcgatggcgagttcttcgcggtgcaggataacctgcacgcatggggactgggcttgcggatggttacctggac  
ggtgatattgtcgaatgcaggttgcatttccggcaagttctgctgcccgaacgggaaggtgaaggcgtgctgctgctg  
caaacctatcaaggtattcccaatcaaggtcgaaggcagatgaagtgcacgtcgatctcgacaacggggagttgaagt  
gatggctacccatgtggcgatcatcggcaatggcgtgggtggcttacgacccgcagggccctacgtgccgagggct  
tcgaggggagaatctcgcgtgatgggggacgaaccgcatctcccctatgaccgaccatccttgtccaaggcgggtctc  
gacggcagccttgagcggccgcccatactggccgagggcagatgggtacggcgagggcccgcacatcgacatgctgaccgg  
cccggaaagtcactgccccttgatgtgcagacaaggacgatcagctggatgatggcaccacgctctctcggcagcca  
tcgtcatcgcgacgggagctcgagcgcggacgatggcgttgcggcagccaactgcccggcgtcgtaacgctgcgc  
acctacggtgacgtgcaggtattgcgcatagttggacttccgcgacgcggctgctgattgtgggtggcgattgat  
cggctgcgaggtcgcgacgacggcgcgcaagctcggcctgctgggtcacgatcctggaggcaggtgatgaactgctgg  
tccgagtaactgggcccgtatcgggtgctggctgcccggcctgctgacagaacttgggtgagcaggtcgagttggga  
acgggtgctcgtagggttttctgggtgagggccagctcgaacaagtcattggccagcagatgggcccagcttctgtagccga  
tagcgcactcatttgcgtcggcgcggagcccgggatcaacttgcgctcaagcgggcttggcatgtgaccgcccggc  
tcattgtcgatcactgcgggtgcgacgcttgcacaaggcgtattcgcctcggagatgtggccagttggccgctgcgc  
gccggcggcggcgttcgctcgaaacctatataaacgcgcagcgcacaagccgcccgggtggctgcccggcattctggg  
gaaaaacgtatcggcaccgcaactgcccgtgctcctggacggagatcgtgggcatcgatgcagatggcgggcgata  
tcgaaggacctgggtgatttctcgtctcgcgcccagatgcccggtagtggcgtgcccctgttgttccgctgcaggagcga  
aggattcaggcggctcgtcgcggtcgatgcaccccgctgacttgcgcttgcacaccgattggtagaagcccgcgccc  
aatcgagccagcagcgtggcagatcttcaaacagatgcgctgattttgttctgctcgaatgaaggagacctaacgt  
gatggcagatctcaattggatatacggccggccacgcgatcgtgacgtcggtaacctcgagctcgtgtaagaaaccg  
ctgctgcgaaatttgaacgccagcacatggactcgtctactagcgcagcttaattaacctaggctgctgccaccgct  
gagcaataactagcataaaccttggggcctctaaacgggtcttgaggggtttttgctgaaacctcaggcatttga  
gaagcacacgggtcacactgcttccggtagtcaataaacgggtaaacagcaatagacataagcgggctatttaacgac  
cctgccctgaaccgacgaccgggtcatcgtggccggatcttgcggccccctcggcttgaacgaattgttagacattat

ttgccgactaccttggtgatctcgcctttcacgtagtggacaaattcttccaactgatctgcgcgcgaggccaagcg  
atcttcttcttgtccaagataagcctgtctagcttcaagtatgacgggctgatactgggcccggcaggcgctccattg  
cccagtcggcagcgacatccttcggcgcgatTTTTGCGGTTACTGCGCTGTACCAAATGCGGGACAACGTAAGCACT  
acatttcgctcatcgccagcccagtcggggcgagttccatagcgttaaggTTTTcatttagcgcctcaaatagatc  
ctggttcaggaaccggatcaaagagttcctccgcccgtggacctaccaaggcaacgctatgttctcttgcttttgtca  
gcaagatagccagatcaatgtcgatcgtggctggctcgaagatacctgcaagaatgtcattgcgctgccattctcca  
aattgcagttcgcgcttagctggataacgccacggaatgatgtcgtcgtgcacaacaatggtgacttctacagcgcg  
gagaatctcgtctctccaggggaagccgaagtttccaaaaggctcgttgatcaaagctcgcgcggttgtttcatcaa  
gccttacgggtcaccgtaaccagcaaatcaatatcactgtgtggcttcaggccgccatccactgcgggagccgtacaaa  
tgtacggccagcaacgtcggttcgagatggcgctcgatgacgccaaactacctctgatagttgagtcgatacttcggc  
gatcaccgcttccctcatactcttccctttttcaatattattgaagcatttatcaggggttattgtctcatgagcggat  
acataattgaatgtatttagaaaaataaacaataatagctagctcactcggctcgtacgctccggggcgtagactgcgg  
cggcgctgcggacacatacaaaagttaccacagattccgtggataagcaggggactaacatgtgagggcaaaacagc  
agggccgcgccgggtggcgTTTTccataggctccgccctcctgccagagttcacataaacagacgcttttccgggtgc  
atctgtgggagccgtgaggctcaaccatgaatctgacagtacggggcaaacccgacaggacttaaagatccccaccg  
tttccggcgggctcgtctccctcttgcgctctcctgttccgacctgcccgtttaccggataacctgttccgcctttctcc  
cttacgggaagtgtggcgctttctcatagctcacacactggtatctcggctcgggtgtaggtcgttccgctccaagctg  
ggctgtaagcaagaactccccgttcagccccgactgctgcgccttatccggtaactgttcaacttgagtcacaaccggga  
aaagcacggtaaaacgccactggcagcagccattggtaactgggagttcgcagaggatttggttagctaaacacgcg  
gttgctcttgaagtgtgcgcaaaagtcgggctacactggaaggacagatttggttgctgtgctctgcgaaagccagt  
taccacggtaagcagttccccaaactgacttaaccttcgatcaaaccacctccccagggtgggtttttcgtttacagg  
gcaaaagattacgcgcagaaaaaaggatctcaagaagatcctttgatcttttctactgaaccgctctagatttcag  
tgcaatttatctcttcaaagttagcacctgaagtcagccccatacgatataagttgtaattctcatgttagtcatgc  
cccgcgcccaccggaaggagctgactgggttgaaggctctcaagggcatcggctcgagatcccgggtgcctaattgagt  
agctaaacttacattaattgcggttgcgctcactgcccgtttccagtcgggaaacctgtcgtgccagctgcattaatg  
aatcggccaacgcgcggggagagggcggtttgcgctattgggcgccagggtgggtttttcttttaccagtgagacgggc  
aacagctgattgcccttcaccgcctggccctgagagagttgcagcaagcgggtccacgctgggtttgccccagcaggcg  
aaaatcctgtttgatgggtggttaacggcgggatataacatgagctgtcttcgggtatcgtcgtatcccactaccgaga  
tgtccgcaccaacgcgcagccccgactcggtaattggcgcgcatcggcccagcgcctctgatcgttggcaaccagc  
atcgcagtgggaaacgatgccctcattcagcatttgcatggtttggtgaaaaccggacatggcactccagtcgccttc  
ccgttccgctatcggctgaatttgattgagtgagatatttatgccagccagccagacgcagacgcgcccagacag  
aacttaatgggcccgctaacagcgcgatttgctgggtgacccaatgcgaccagatgctccacgcccagtcgctaccg  
tcttcatgggagaaaaataactggttgatgggtgtctggctcagagacatcaagaaaaaacgccggaacattagtca  
ggcagcttccacagcaatggcactcctggctcaccagcggatagttaatgatcagcccactgacgcggttgcgagaa  
gattgtgcaccgcccgtttacaggcttcgacgcgcgcttcggttctaccatcgacaccaccacgctggcaccagttga  
tcggcgcgagatttaategcgcgacaatttgcgacggcgcgctgcagggccagactggaggtggcaacgccaatcag  
caacgactgtttgcccgcagttggtgtgccacgcgggttgggaatgtaattcagctccgccatcgcgcgcttccactt  
tttcccgcggttttcgcagaaacgtggctggcctgggttaccacgcgggaaacggctctgataagagacaccggcatac  
tctgcgacatcgtataacgttactggtttcacattcaccacctgaattgactctcttccgggctatcatgccat  
accgcgaaaggttttgcgccattcgatgggtgtccgggatctcgacgctctcccttatgcgactcctgcattagggaa  
ttaatacgactcactata

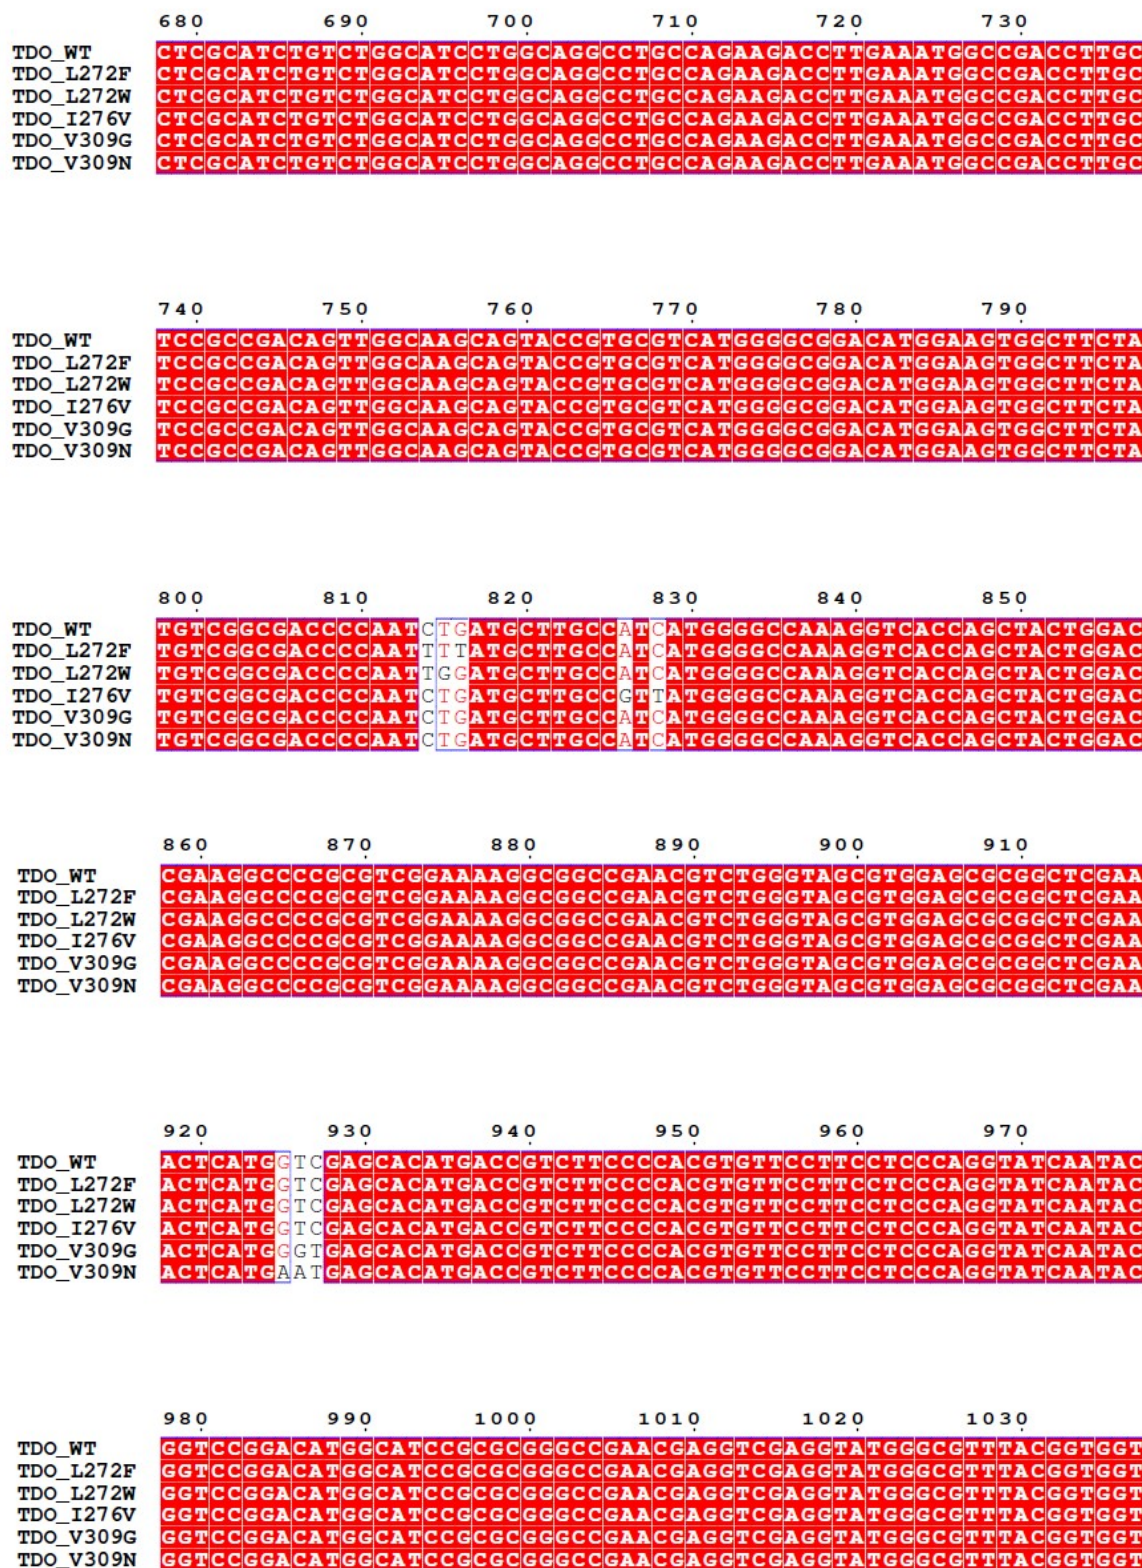

**Figure S3:** Multiple sequence alignment of sequencing data from TDO variants with single active site mutations. Alignment performed with M-Coffee.<sup>12</sup> Image generated with ESPrict.<sup>13</sup>



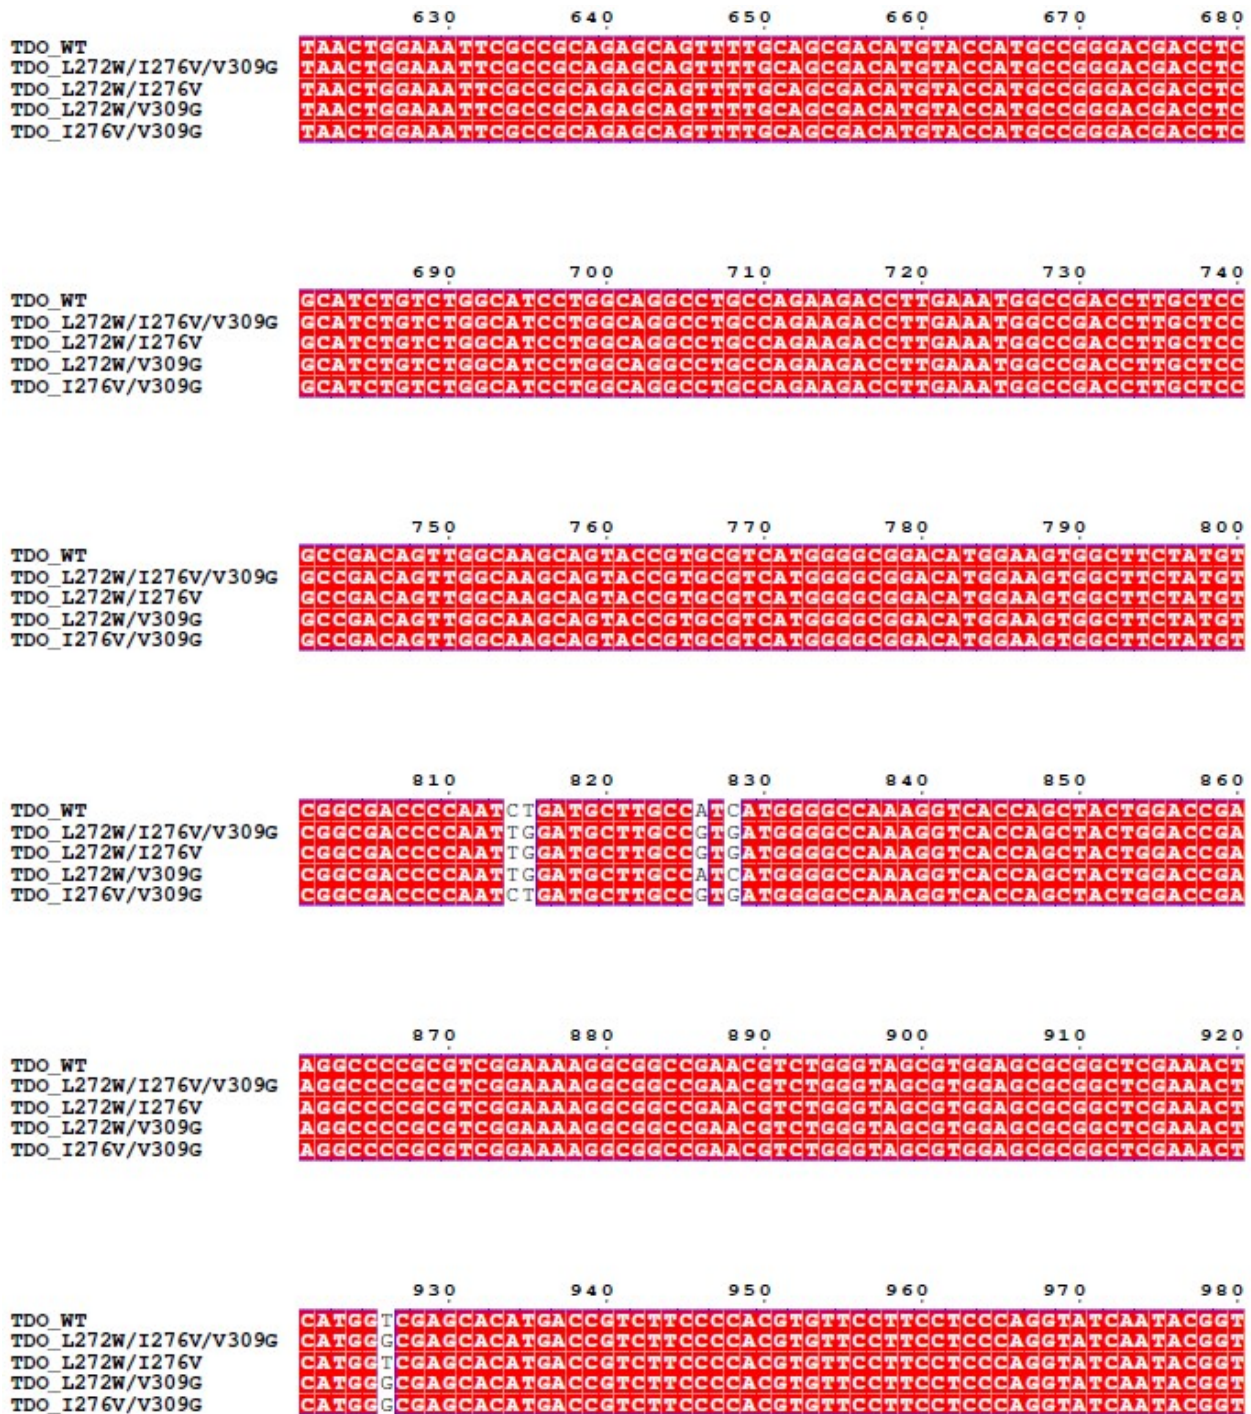

**Figure S4:** Multiple sequence alignment of sequencing data from TDO variants with double and triple active site mutations. Alignment performed with M-Coffee.<sup>12</sup> Image generated with ESPrpt.<sup>13</sup>

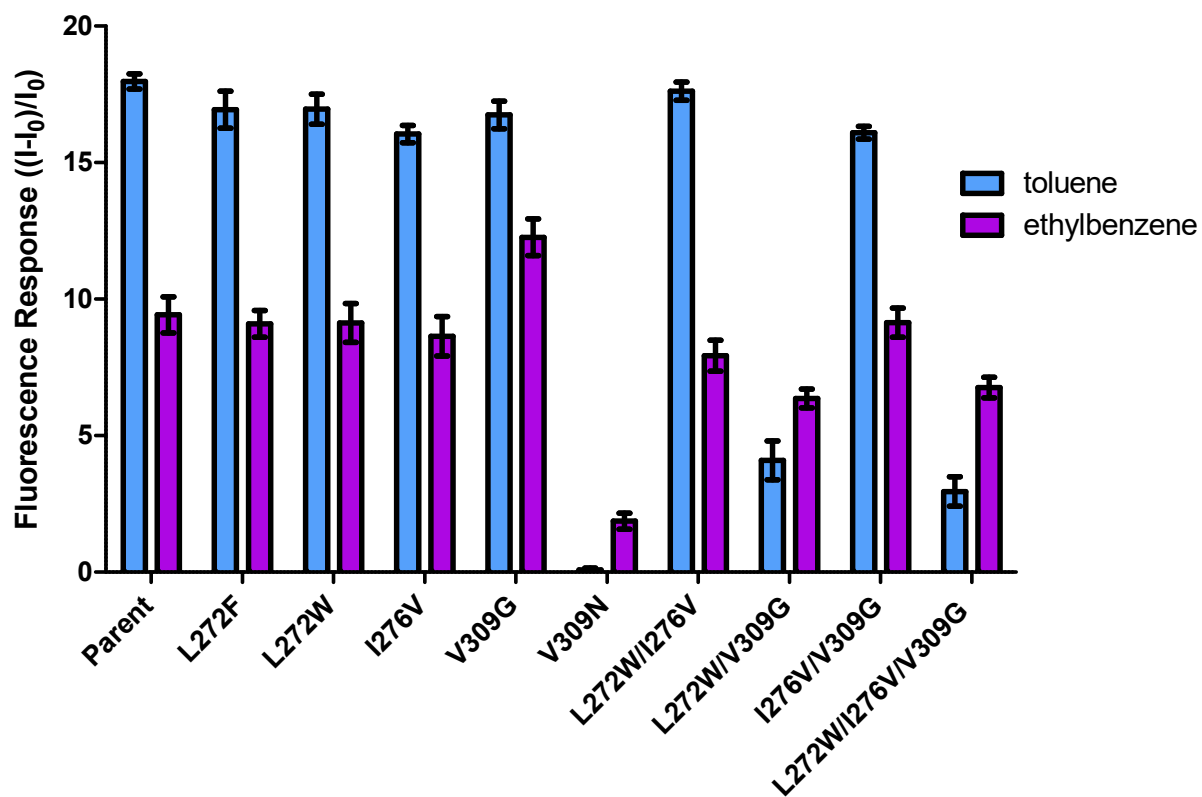

**Figure S5:** Relative activity of TDO variants for the native substrate (toluene) and ethylbenzene compared to the parent enzyme ( $n = 6$ ). Fluorescence response of each variant was normalized to the mean fluorescence response of the negative controls (*E. coli* BL21 (DE3) pCP-01)<sup>5</sup> ( $[I - I_0]/I_0$ ) ( $n = 6$ ).

[(5S,6R)-5,6-Dihydroxy-1,3-cyclohexadien-1-yl]methylacetamide (**1**)

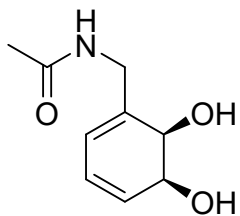

20

$R_f = 0.45$  [4:1 (DCM:MeOH)];  $[\alpha]_D = +12.1$  ( $c = 0.51$ , MeOH); IR (film)  $\nu$  3288, 2917, 1637, 1551, 1422, 1373, 1290, 1151, 1075, 1036, 994, 928, 866, 810;  $^1\text{H NMR}$  (400 MHz, MeOD)  $\delta$  5.91 (m, 1H), 5.80 (m, 2H), 4.21 (s, 1H), 4.05-3.99 (m, 2H), 3.83 (d,  $J = 16.3$ , 1H), 1.96 (s, 3H);  $^{13}\text{C NMR}$  (100 MHz, MeOD)  $\delta$  176.1, 141.4, 133.1, 127.5, 124.0, 72.9, 72.2, 45.5, 25.1; HRMS (ESI) calcd. for  $\text{C}_9\text{H}_{13}\text{NO}_3\text{Na}^+$ : 206.0793, found: 206.0793.

[(5S,6R)-5,6-Dihydroxy-1,3-cyclohexadien-1-yl]ethylacetamide (**2**)

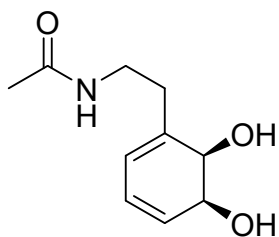

20

$R_f = 0.52$  [4:1 (DCM:MeOH)];  $[\alpha]_D = +22.0$  ( $c = 0.58$ , MeOH); IR (film)  $\nu$  3288, 3104, 1631, 1555, 1436, 1372, 1297, 1157, 1081, 1062, 1018, 987, 805;  $^1\text{H NMR}$  (400 MHz, MeOD)  $\delta$  5.89 (m, 1H), 5.73 (m, 2H), 4.19 (s, 1H), 3.99 (d,  $J = 5.9$ , 1H), 3.39-3.28 (m, 2H), 2.43-2.31 (m, 2H), 1.89 (s, 3H);  $^{13}\text{C NMR}$  (100 MHz, MeOD)  $\delta$  171.9, 138.5, 128.2, 124.0, 121.1, 69.4, 69.0, 38.0, 33.5, 21.3; HRMS (ESI) calcd. for  $\text{C}_{10}\text{H}_{15}\text{NO}_3\text{Na}^+$ : 220.0950, found: 220.0950.

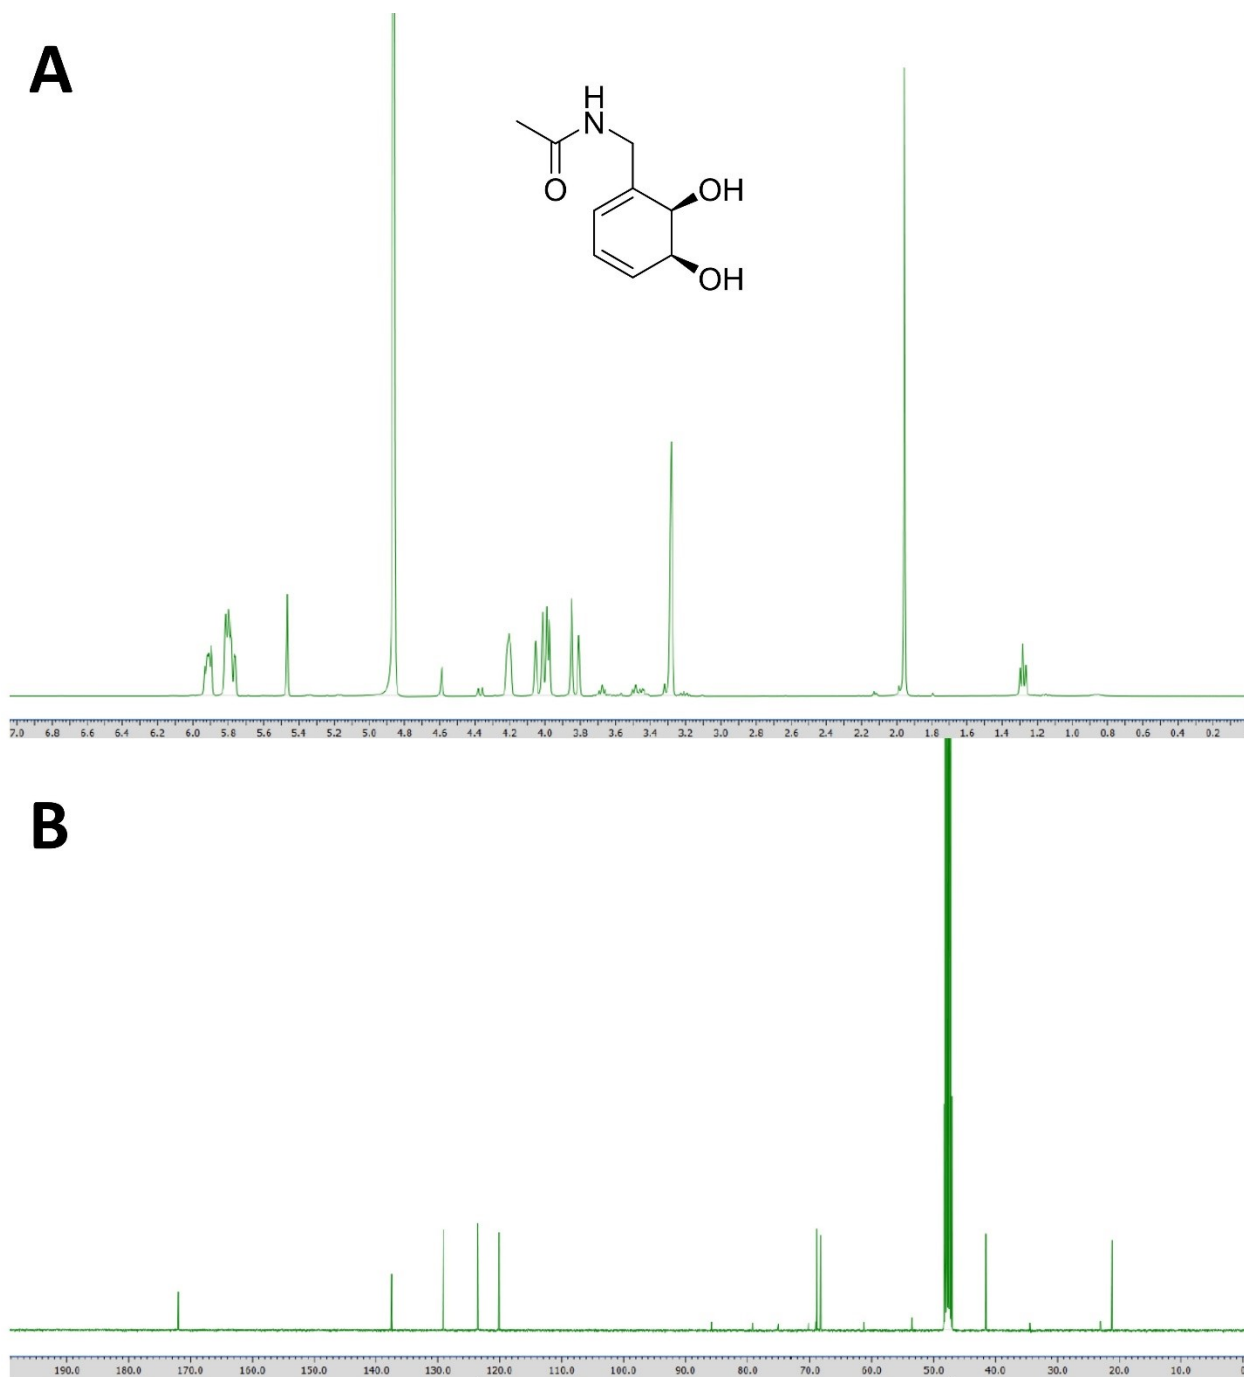

**Figure S6:** (A)  $^1\text{H}$  NMR spectrum of [(5S,6R)-5,6-Dihydroxy-1,3-cyclohexadien-1-yl]methylacetamide (**1**). NMR analysis performed in MeOD; (B)  $^{13}\text{C}$  NMR spectrum of [(5S,6R)-5,6-Dihydroxy-1,3-cyclohexadien-1-yl]methylacetamide (**1**). NMR analysis performed in MeOD.

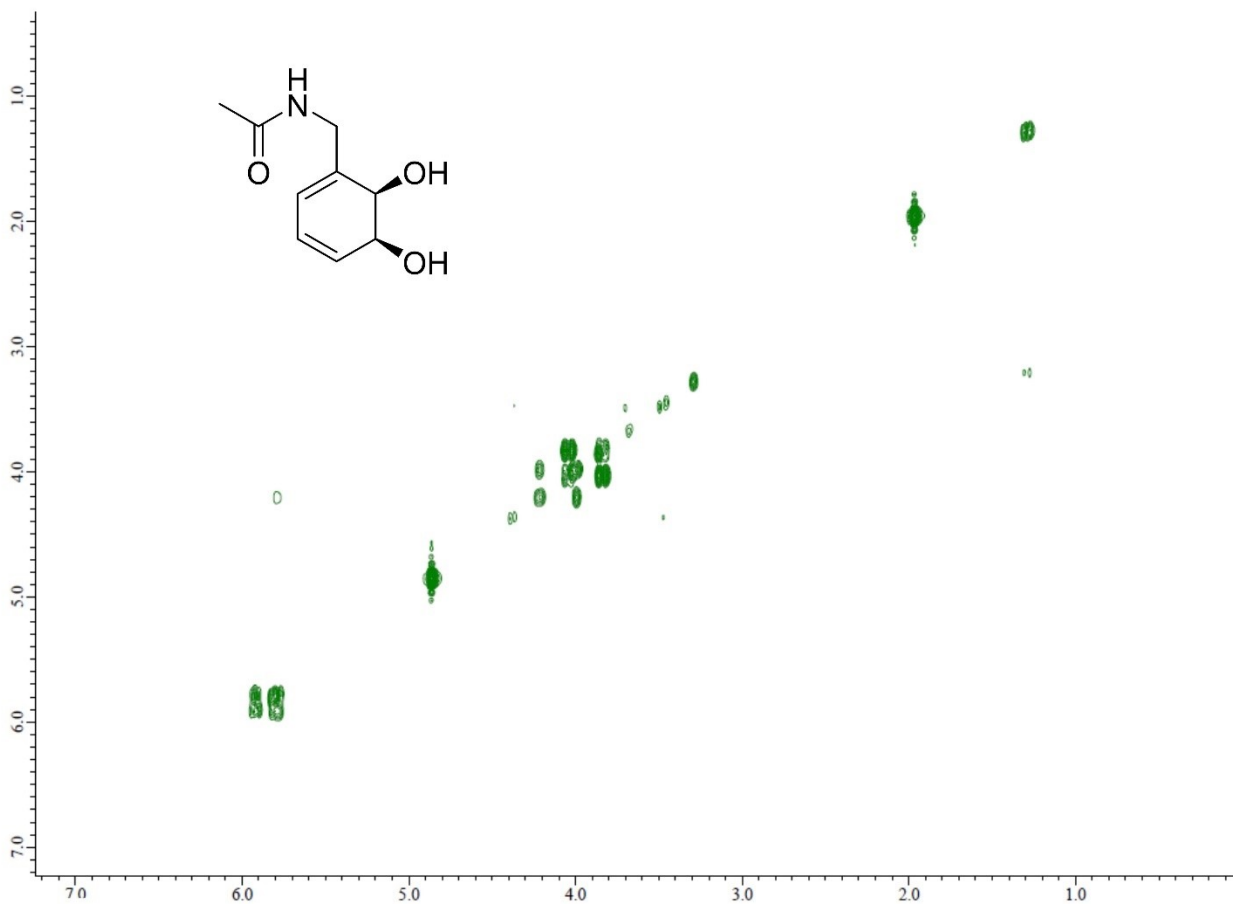

**Figure S7:** Correlation NMR (COSY) spectrum of [(5S,6R)-5,6-Dihydroxy-1,3-cyclohexadien-1-yl]methylacetamide (**1**). NMR analysis performed in MeOD.



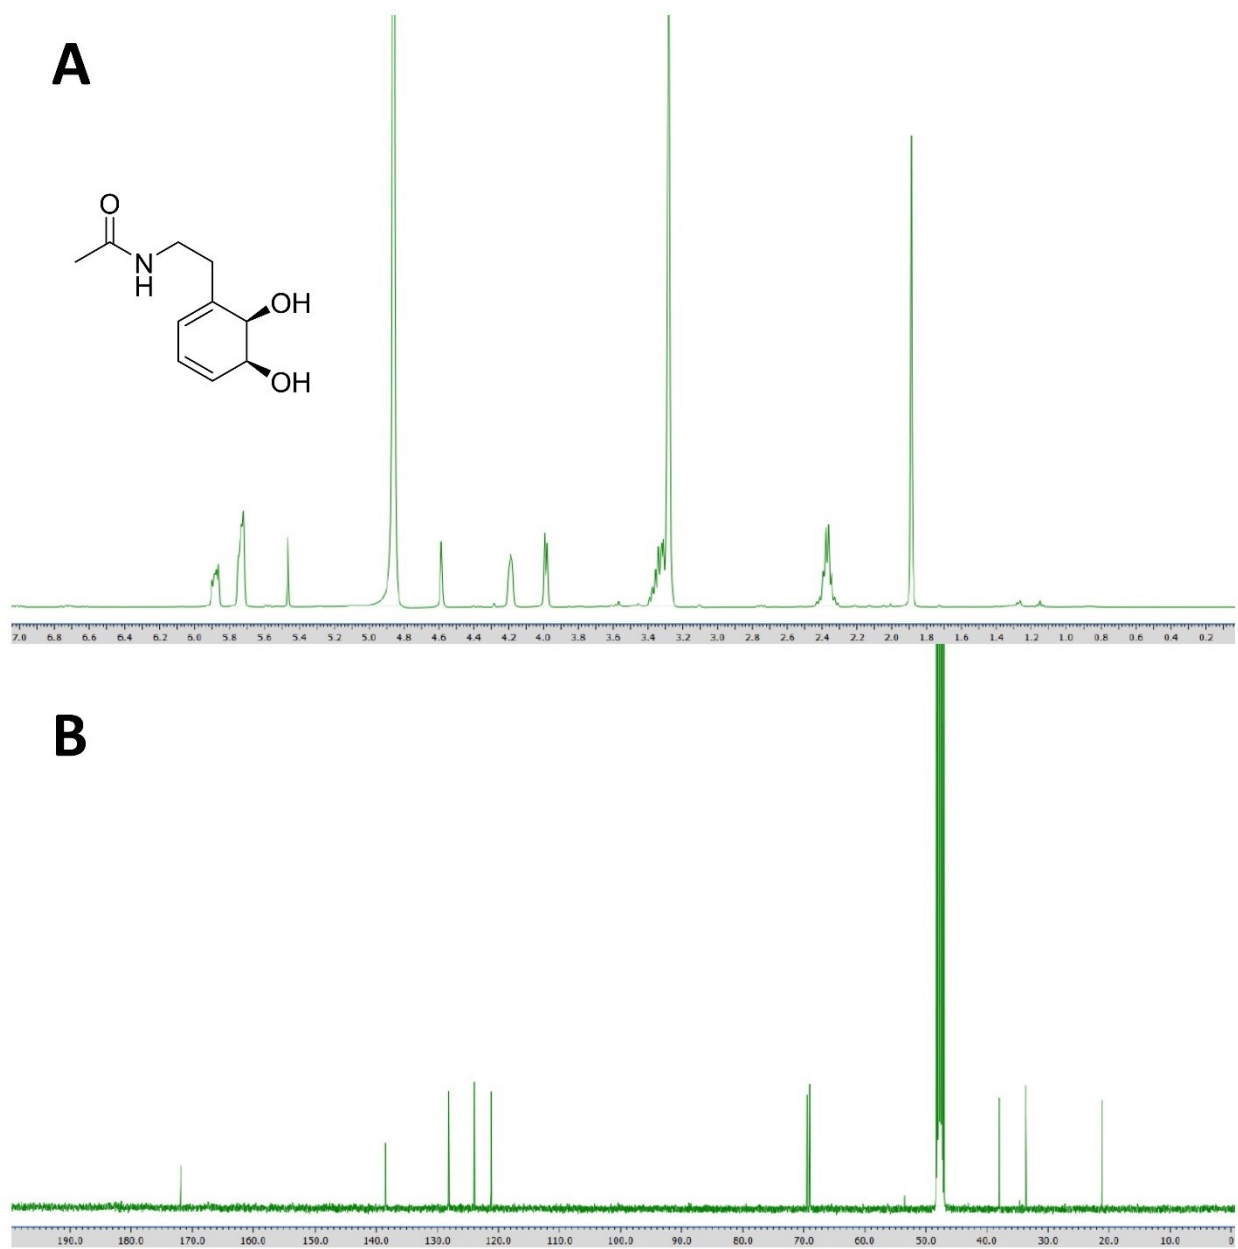

**Figure S8:** (A)  $^1\text{H}$  NMR spectrum of [(5S,6R)-5,6-Dihydroxy-1,3-cyclohexadien-1-yl]ethylacetamide (**2**). NMR analysis performed in MeOD; (B)  $^{13}\text{C}$  NMR spectrum of [(5S,6R)-5,6-Dihydroxy-1,3-cyclohexadien-1-yl]ethylacetamide (**2**). NMR analysis performed in MeOD.

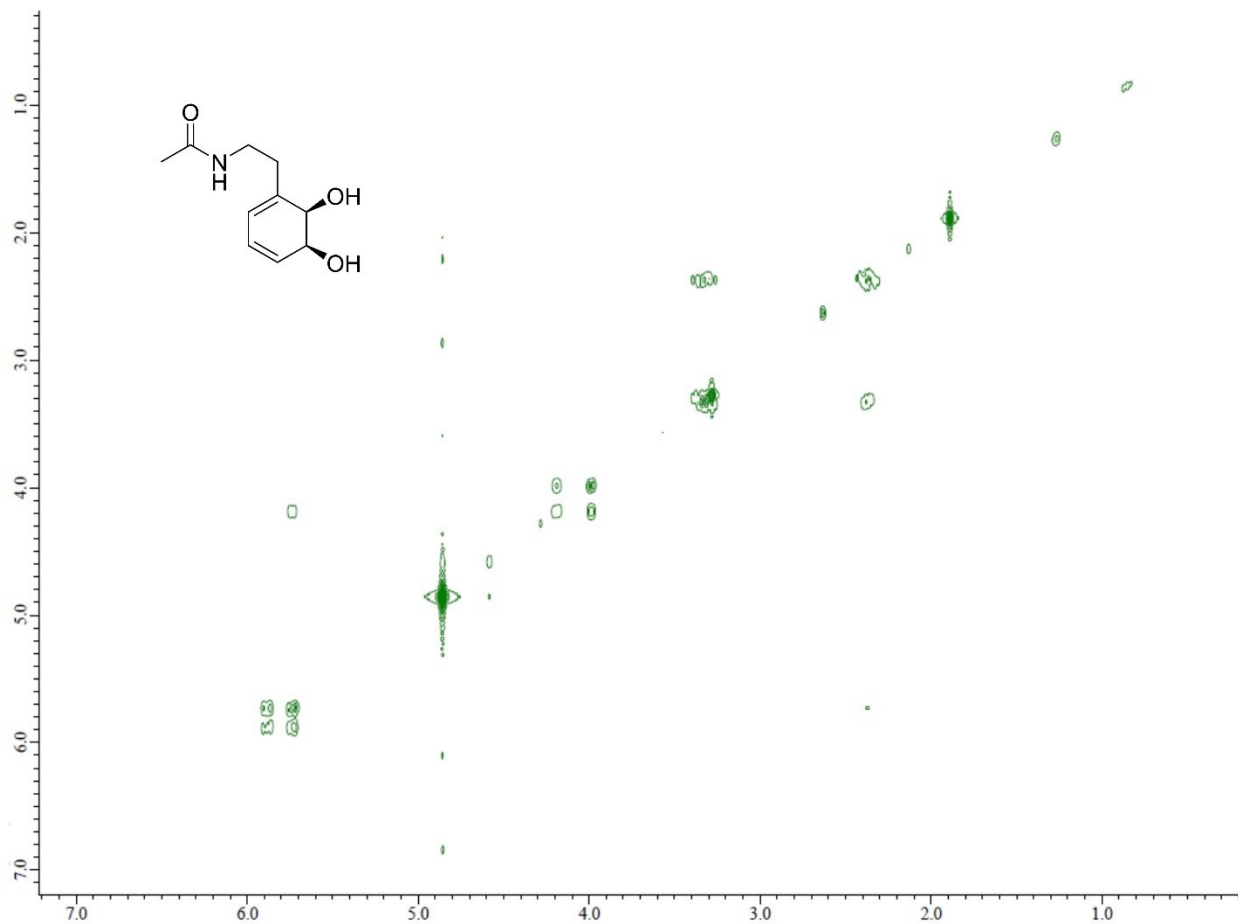

**Figure S9:** Correlation NMR (COSY) spectrum of [(5S,6R)-5,6-Dihydroxy-1,3-cyclohexadien-1-yl]methylacetamide (**1**). NMR analysis performed in MeOD.

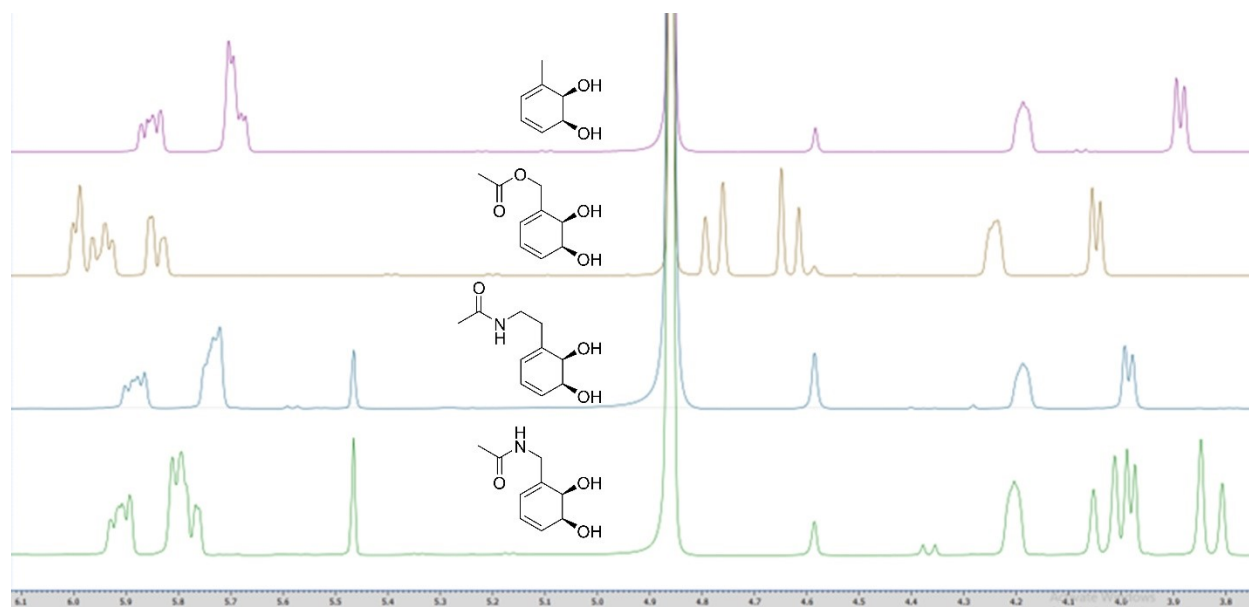

**Figure S10:** Comparison of the  $^1\text{H}$  NMR spectra of [(5S,6R)-5,6-Dihydroxy-1,3-cyclohexadien-1-yl]methylacetamide (**1**) and [(5S,6R)-5,6-Dihydroxy-1,3-cyclohexadien-1-yl]ethylacetamide (**2**) with other previously characterized *cis*-diol metabolites produced by the wild-type toluene dioxygenase (TDO). Overlay isolates alkene signals and  $\text{CHOH}$  signals. All NMR analyses performed in MeOD.

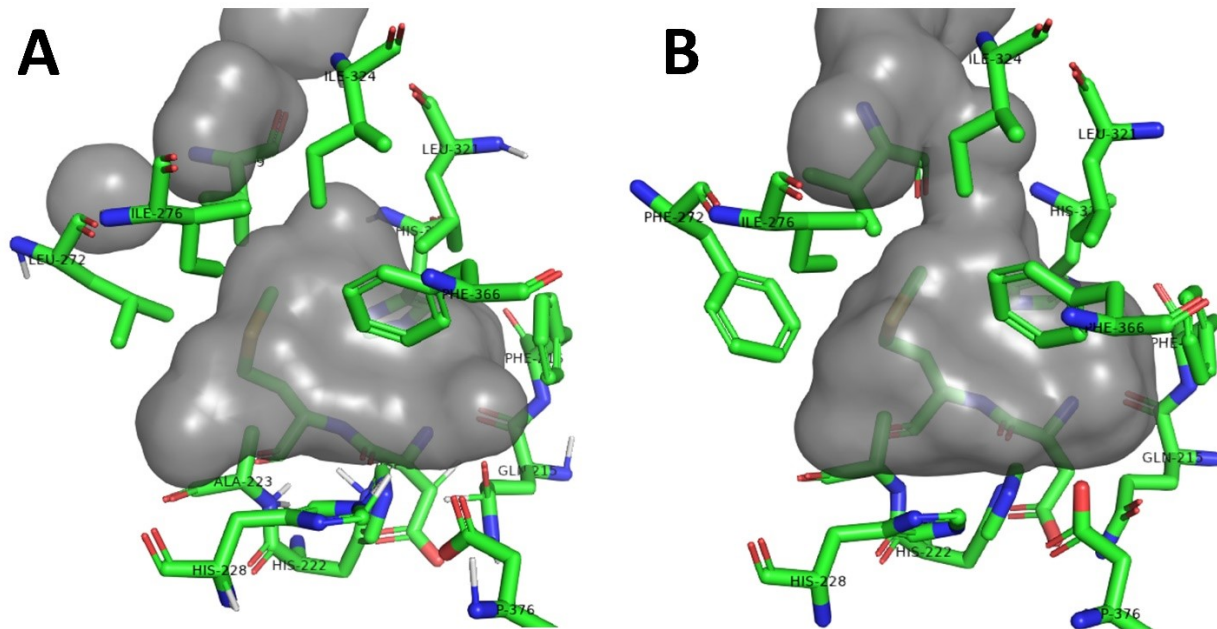

**Figure S11:** (A) Visualization of the active site cavity of TDO (wild-type). Image generated using the reported crystal structure of TDO<sup>14</sup> and with PyMOL.<sup>4</sup> (B) Visualization of the active site cavity of TDO L272F. Image generated using a homology model of TDO L272F and with PyMOL.<sup>4</sup>

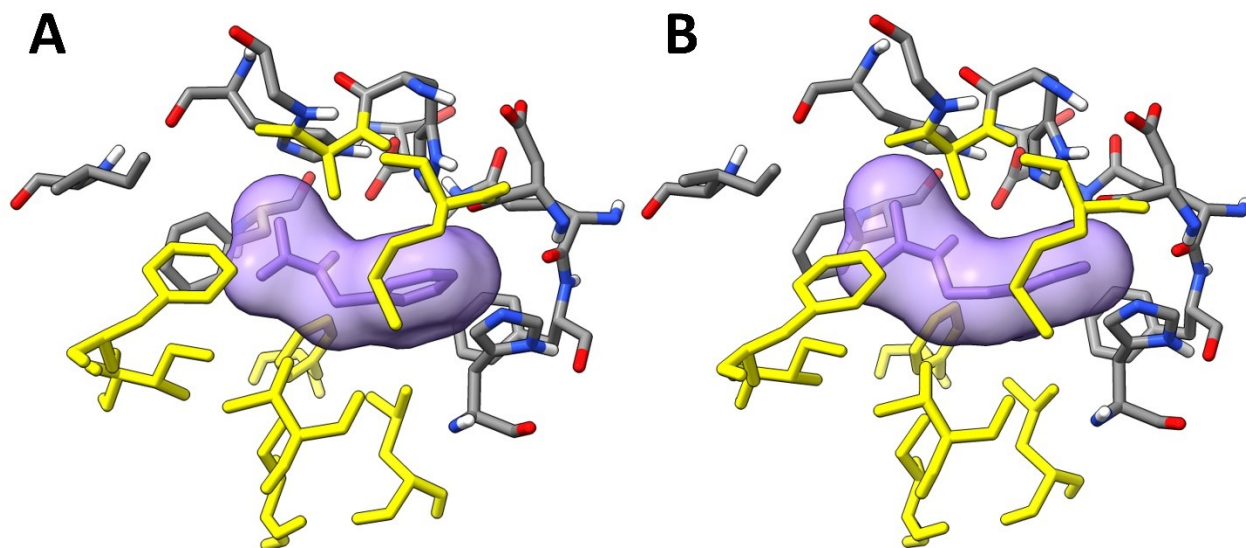

**Figure S12:** (A) Active site structure produced from molecular dynamics simulations performed on the docking prediction of TDO L272F with *N*-benzylacetamide (purple). Residues targeted for mutagenesis in this study are highlighted (yellow). Docking was performed with AutoDock Vina,<sup>2</sup> using a TDO L272F homology model. Molecular dynamics simulations were performed with GROMACS.<sup>3</sup> Image was generated using ChimeraX software.<sup>15</sup> (B) Active site structure produced from molecular dynamics simulations performed on the docking prediction of TDO L272F with *N*-(2-phenethyl)acetamide (purple). Residues targeted for mutagenesis in this study are highlighted (yellow). Docking was performed with AutoDock Vina,<sup>2</sup> using a TDO L272F homology model. Molecular dynamics simulations were performed with GROMACS.<sup>3</sup> Image was generated using ChimeraX software.<sup>15</sup>

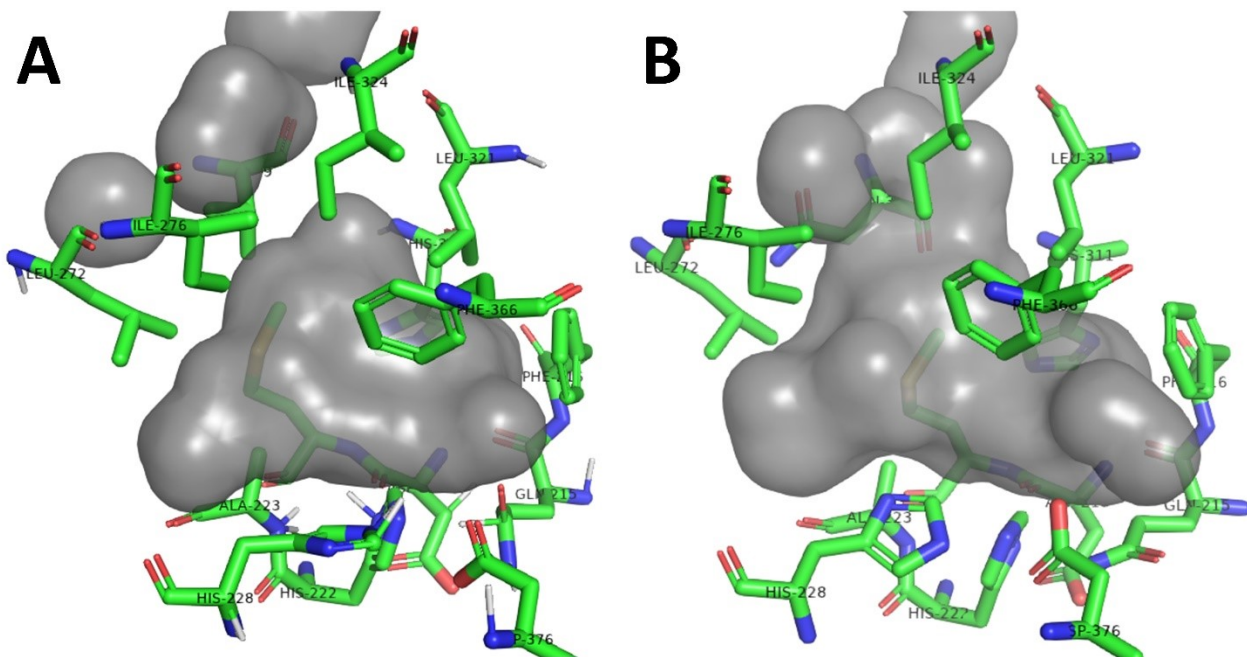

**Figure S13:** (A) Visualization of the active site cavity of TDO (wild-type). Image generated using the reported crystal structure of TDO<sup>14</sup> and with PyMOL.<sup>4</sup> (B) Visualization of the active site cavity of TDO V309N. Image generated using a homology model of TDO V309N and with PyMOL.<sup>4</sup>

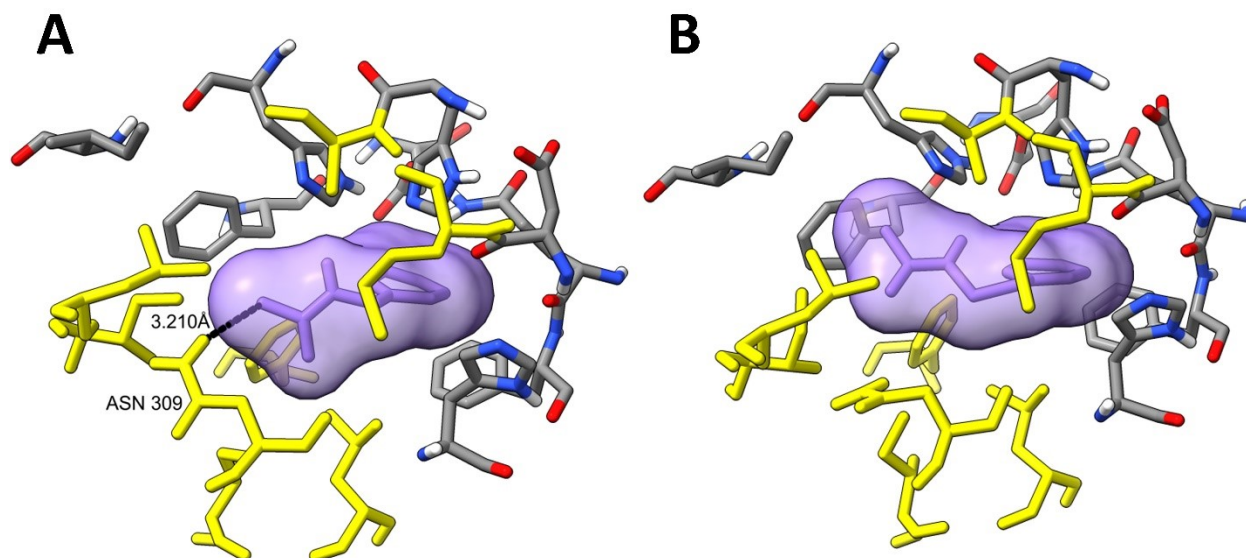

**Figure S14:** (A) Active site structure produced from molecular dynamics simulations performed on the docking prediction of TDO V309N with *N*-benzylacetamide (purple). The distance between the substrate and the N309 residue is shown. Residues targeted for mutagenesis in this study are highlighted (yellow). Docking was performed with AutoDock Vina,<sup>2</sup> using a TDO V309N homology model. Molecular dynamics simulations were performed with GROMACS.<sup>3</sup> Image was generated using ChimeraX software.<sup>15</sup> (B) Active site structure produced from molecular dynamics simulations performed on the docking prediction of TDO V309N with *N*-(2-phenethyl)acetamide (purple). Residues targeted for mutagenesis in this study are highlighted (yellow). Docking was performed with AutoDock Vina,<sup>2</sup> using a TDO V309N homology model. Molecular dynamics simulations were performed with GROMACS.<sup>3</sup> Image was generated using ChimeraX software.<sup>15</sup>

## References

- 1) 16 J. Jumper, R. Evans, A. Pritzel, T. Green, M. Figurnov, O. Ronneberger, K. Tunyasuvunakool, R. Bates, A. Žídek, A. Potapenko, A. Bridgland, C. Meyer, S. A. A. Kohl, A. J. Ballard, A. Cowie, B. Romera-Paredes, S. Nikolov, R. Jain, J. Adler, T. Back, S. Petersen, D. Reiman, E. Clancy, M. Zielinski, M. Steinegger, M. Pacholska, T. Berghammer, S. Bodenstein, D. Silver, O. Vinyals, A. W. Senior, K. Kavukcuoglu, P. Kohli and D. Hassabis, *Nature* 2021, **596**, 583.
- 2) O. Trott and A. J. Olson, *J. Comput. Chem.* 2010, **31**, 455.
- 3) a) D. van der Spoel, E. Lindahl, B. Hess, G. Groenhof, A. E. Mark and H. J. C. Berendsen, *J. Comp. Chem.* 2005, **26**, 1701; b) S. Pronk, S. Páll, R. Schulz, P. Larsson, P. Bjelkmar, R. Apostolov, M. R. Shirts, J. C. Smith, P. M. Kasson, D. van der Spoel, B. Hess and E. Lindahl, *Bioinformatics*, 2013, **29**, 845; c) M. J. Abraham, T. Murtola, R. Schulz, S. Páll, J. C. Smith, B. Hess and E. Lindahl, *SoftwareX* 2015, **1**, 19.
- 4) The PyMOL Molecular Graphics System, Version 2.0 Schrödinger, LLC.
- 5) C. Preston-Herrera, A. S. Jackson, B. O. Bachmann and J. T. Froese, *Org. Biomol. Chem.* 2021, **19**, 775.
- 6) G. J. Zylstra and D. T. Gibson, *J. Biol. Chem.* 1989, 264, 14940.
- 7) (a) L. Zheng, U. Baumann and J.-L. Reymond, *Nuc. Acids Res.* 2004, **32**, e115; (b) H. Liu and J. H. Naismith, *BMC Biotechnology* 2008, **8**, 91.
- 8) M. A. Endoma, V. P. Bui, J. Hansen and T. Hudlicky, *Org. Process Res. Dev.* 2002, **6**, 525.
- 9) J. Marley, M. Lu and C. Bracken, *J. Biomol. NMR* 2001, **20**, 71.
- 10) G. M. Morris, R. Huey, W. Lindstrom, M. F. Sanner, R. K. Belew, D. S. Goodsell and A. J. Olson, *J. Comput. Chem.* 2009, **16**, 2785.
- 11) (a) R. B. Best, X. Zhu, J. Shim, P. E. M. Lopes, J. Mittal, M. Feig and A. D. MacKerell Jr., *J. Chem. Theory Comput.* 2009, **8**, 3257; (b) J. Huang, S. Rauscher, G. Nawrocki, T. Ran, M. Feig, B. L. de Groot, H. Grubmuller and A. D. MacKerell Jr., *Nature Methods*, 2016, **14**, 71.
- 12) (a) C. Notredame, D. G. Higgins and J. Heringa, *J. Mol. Biol.* **2000**, 302, 205; (b) I. M. Wallace, O. O'Sullivan, D. G. Higgins and C. Notredame, *Nuc. Acids Res.* **2006**, 34, 1692; (c) S. Moretti, F. Armougom, I. M. Wallace, D. G. Higgins, C. V. Jongeneel and C. Notredame, *Nuc. Acids Res.* **2007**, 35, W645; (d) P. Di Tommaso, S. Moretti, I. Xenarios, M. Orobitg, A. Montanyola, J.-M. Chang, J.-F. Taly and C. Notredame, *Nuc. Acids Res.* **2011**, 39, W13.
- 13) X. Robert and P. Gouet, *Nuc. Acids Res.* **2014**, 42, W320.



14) R. Friemann, K. Lee, E. N. Brown, D. T. Gibson, H. Eklund and S. Ramaswamy, *Acta Crys.* 2009, **D65**, 24.

15) T. D. Goddard, C. C. Huang, E. C. Meng, E. F. Pettersen, G. S. Couch, J. H. Morris and T. E. Ferrin, *Protein Sci.* 2018, **27**, 14.
